# Supplementary material for: Dietary Potassium and Clinical Outcomes among Patients on Peritoneal Dialysis
Source: MDPI journal article supplement (doi:10.3390/nu15194271), 2023-10-06
Supplement: s1 [file s1]

**Table S1.** Clinical characteristics of peritoneal dialysis patients according to time-averaged dietary potassium ( $n = 881$ )

| Characteristic                             | Time-averaged dietary potassium |                     | <i>p</i> |
|--------------------------------------------|---------------------------------|---------------------|----------|
|                                            | <1200 mg/d                      | ≥1200 mg/d          |          |
| Age, years Male,                           | 60.3 ± 14.9 <sup>1</sup>        | 56.5 ± 14.6         | < 0.001  |
| n (%) BMI <sup>2</sup> , kg/m <sup>2</sup> | 103 (35.6)                      | 331 (55.9)          | < 0.001  |
| Educational level                          | 22.8 ± 4.0                      | 23.4 ± 3.5          | 0.031    |
|                                            |                                 |                     | < 0.001  |
| ≤Elementary school, n (%)                  | 76 (26.3)                       | 73 (12.3)           |          |
| Middle school, n (%)                       | 82 (28.4)                       | 147 (24.8)          |          |
| High school, n (%)                         | 71 (24.6)                       | 173 (29.2)          |          |
| >High school, n (%)                        | 60 (20.8)                       | 199 (33.6)          |          |
| DM, n (%)                                  | 142 (49.1)                      | 229 (38.7)          | 0.003    |
| CV disease, n (%)                          | 140 (48.4)                      | 235 (39.7)          | 0.014    |
| SBP, mmHg                                  | 133.9 ± 17.7                    | 134.2 ± 14.1        | 0.854    |
| DBP, mmHg                                  | 76.7 ± 10.5                     | 79.0 ± 10.1         | 0.003    |
| MAP, mmHg                                  | 96.8 ± 11.6                     | 98.2 ± 10.6         | 0.075    |
| Laboratory and nutritional data            |                                 |                     |          |
| Albumin, g/L                               | 34.7 ± 4.3                      | 36.5 ± 3.9          | < 0.001  |
| Hemoglobin, g/L                            | 107.9 ± 15.1                    | 109.9 ± 13.8        | 0.068    |
| Hs-CRP, mg/L                               | 5.7 (2.2, 12.8)                 | 3.4 (1.3, 7.3)      | < 0.001  |
| Urea nitrogen, mmol/L                      | 20.2 ± 5.1                      | 22.6 ± 4.6          | < 0.001  |
| Serum creatinine, μmol/L                   | 737.0 ± 222.4                   | 812.2 ± 254.0       | < 0.001  |
| Serum calcium, mmol/L                      | 2.3 ± 0.4                       | 2.3 ± 0.3           | 0.361    |
| Serum phosphorus, mmol/L                   | 1.5 ± 0.4                       | 1.6 ± 0.3           | 0.001    |
| Serum potassium, mmol/L                    | 4.2 ± 0.5                       | 4.5 ± 0.5           | < 0.001  |
| Serum sodium, mmol/L                       | 138.5 ± 3.6                     | 138.9 ± 2.5         | 0.060    |
| HDL-cholesterol, mmol/L                    | 1.1 ± 0.3                       | 1.1 ± 0.3           | 0.431    |
| LDL-cholesterol, mmol/L                    | 2.7 ± 0.7                       | 2.6 ± 0.7           | 0.021    |
| Total cholesterol, mmol/L                  | 5.0 ± 1.1                       | 4.8 ± 1.9           | 0.037    |
| Triglycerides, mmol/L                      | 1.7 (1.3, 2.4)                  | 1.6 (1.3, 2.3)      | 0.480    |
| iPTH, pg/mL                                | 136.4 (76.7, 233.8)             | 147.8 (79.1, 249.0) | 0.505    |
| Total CCr, L/w/1.73 m <sup>2</sup>         | 60.3 ± 16.6                     | 63.5 ± 18.5         | 0.014    |
| Total Kt/V                                 | 1.9 ± 0.4                       | 1.9 ± 0.4           | 0.917    |
| RRF, ml/min                                | 2.5 (1.5, 3.8)                  | 2.8 (1.7, 4.6)      | 0.010    |
| Energy intake, kcal/day                    | 1117.7 ± 193.5                  | 1473.7 ± 248.1      | < 0.001  |
| Protein intake, g/day                      | 39.7 ± 8.9                      | 54.2 ± 9.9          | < 0.001  |
| Fat intake, g/day                          | 45.1 ± 10.5                     | 57.7 ± 11.9         | < 0.001  |
| Carbohydrate intake, g/day                 | 141.3 ± 30.0                    | 191.2 ± 41.4        | < 0.001  |
| Fiber intake, g/day                        | 5.5 ± 1.7                       | 8.7 ± 2.8           | < 0.001  |
| Fatty acid intake, g/day                   | 43.1 ± 10.6                     | 43.9 ± 11.1         | 0.475    |
| Potassium intake, mg/day                   | 989.4 ± 161.4                   | 1558.7 ± 297.0      | < 0.001  |
| nDEI, kcal/kg/d                            | 24.0 ± 5.5                      | 27.1 ± 5.7          | < 0.001  |
| nDPI, g/kg/d                               | 0.7 ± 0.2                       | 0.9 ± 0.2           | < 0.001  |

<sup>1</sup> Values are expressed as mean  $\pm$  standard deviation, percentage or median with upper and lower quartile or percentage. <sup>2</sup> Abbreviation: BMI, body mass index; CV, cardiovascular; CCr, creatinine clearance; DM, diabetes mellitus; DBP, diastolic blood pressure; Hs-CRP, high-sensitivity C-reactive protein; HDL, high-density lipoprotein; iPTH, intact parathyroid hormone; Kt/V, urea clearance; LDL, low-density lipoprotein; MAP, mean arterial pressure; nDEI, normalized energy intake; nDPI, normalized protein intake; RRF, residual renal function; SBP, systolic blood pressure.
